# Supplementary material for: Large-Scale SNP Discovery and Genotyping for Constructing a High-Density Genetic Map of Tea Plant Using Specific-Locus Amplified Fragment Sequencing (SLAF-seq)
Source: PubMed Central journal article supplement (PMC4452719; doi:10.1371/journal.pone.0128798), 2015-06-02
Supplement: pone.0128798.s005.pdf [file pone.0128798.s005.pdf]

**S1 Table. Number of SNP and SSR markers with different segregation types used for linkage mapping.**

| Segregation type | SNP  | SSR | Total |
|------------------|------|-----|-------|
| ab×cd            | 81   | 13  | 94    |
| ef×eg            | 1278 | 118 | 1396  |
| hk×hk            | 206  | 40  | 246   |
| lm×ll            | 2492 | 71  | 2563  |
| nn×np            | 1985 | 164 | 2149  |
| Total            | 6042 | 406 | 6448  |
