# Supplementary material for: Large-Scale SNP Discovery and Genotyping for Constructing a High-Density Genetic Map of Tea Plant Using Specific-Locus Amplified Fragment Sequencing (SLAF-seq)
Source: PubMed Central journal article supplement (PMC4452719; doi:10.1371/journal.pone.0128798), 2015-06-02
Supplement: pone.0128798.s006.pdf [file pone.0128798.s006.pdf]

**S2 Table. The average number of loci and markers within 10 cM intervals for each linkage group.**

| Linkage group | Loci | Markers |
|---------------|------|---------|
| LG01          | 8    | 15      |
| LG02          | 9    | 14      |
| LG03          | 11   | 14      |
| LG04          | 12   | 18      |
| LG05          | 9    | 16      |
| LG06          | 11   | 15      |
| LG07          | 11   | 15      |
| LG08          | 9    | 19      |
| LG09          | 8    | 16      |
| LG10          | 13   | 20      |
| LG11          | 8    | 14      |
| LG12          | 11   | 14      |
| LG13          | 11   | 16      |
| LG14          | 8    | 19      |
| LG15          | 8    | 15      |
| Min           | 8    | 14      |
| Max           | 13   | 20      |
