# Supplementary material for: Large-Scale SNP Discovery and Genotyping for Constructing a High-Density Genetic Map of Tea Plant Using Specific-Locus Amplified Fragment Sequencing (SLAF-seq)
Source: PLOS journal article supplement (doi:10.1371/journal.pone.0128798), 2015-06-02
Supplement: S7 (10.1371/journal.pone.0128798.s007) [file journal.pone.0128798.s007]

**S3 Table. Comparison of the frequency of distorted SSR markers between published framework genetic map and newly developed map.** The two genetic maps were constructed based on the same mapping population with a different number of F<sub>1</sub> individuals. The population size was 183 and 148, respectively, for the framework genetic map and newly developed map.

| Linkage group | SSR no. | Framework genetic map |               | Newly developed genetic map |               |
|---------------|---------|-----------------------|---------------|-----------------------------|---------------|
|               |         | Distorted SSR no.     | Frequency (%) | Distorted SSR no.           | Frequency (%) |
| LG01          | 43      | 7                     | 16.3          | 7                           | 16.3          |
| LG02          | 31      | 2                     | 6.5           | 10                          | 32.3          |
| LG03          | 40      | 2                     | 5.0           | -                           | -             |
| LG04          | 20      | 15                    | 75.0          | 17                          | 85.0          |
| LG05          | 24      | 6                     | 25.0          | 1                           | 4.2           |
| LG06          | 28      | 3                     | 10.7          | 9                           | 32.1          |
| LG07          | 20      | 10                    | 50.0          | 10                          | 50.0          |
| LG08          | 32      | 15                    | 46.9          | 25                          | 78.1          |
| LG09          | 30      | 7                     | 23.3          | 6                           | 20.0          |
| LG10          | 26      | 7                     | 26.9          | 10                          | 38.5          |
| LG11          | 17      | -                     | -             | -                           | -             |
| LG12          | 26      | -                     | -             | -                           | -             |
| LG13          | 19      | -                     | -             | 3                           | 15.8          |
| LG14          | 27      | 17                    | 63.0          | 22                          | 81.5          |
| LG15          | 23      | 3                     | 13.0          | 7                           | 30.4          |
| Total         | 406     | 94                    | 23.2          | 127                         | 31.3          |
